# Supplementary material
Source: PubMed Central journal article supplement (PMC4432169)
Supplement: AAC.04580-14_zac007154076so1.pdf [file AAC.04580-14_zac007154076so1.pdf]

TABLE S1 Primers used for PCR amplification of the whole sequence of  
 plasmid pLRSA417

| Primer | Sequence (5'-3')         | Position (bp)* | Product (bp) |
|--------|--------------------------|----------------|--------------|
| CP1F   | GTCTAAACAATTTTTTACGGTAG  | 3-25           | 1701         |
| CP1R   | TTGAACAGCCTCTTTATAAGTGC  | 1681-1703      |              |
| CP2F   | GGTGGGTTGTAATTGGATAACGT  | 1413-1435      | 1865         |
| CP2R   | TTCCGTCCGTCCCCTTTTATAT   | 3256-3277      |              |
| CP3F   | GGTGTTTATAGTAGGTTTGATTT  | 3019-3041      | 1899         |
| CP3R   | TCTGATGTTGTTTCATTGTCTGTT | 4894-4917      |              |
| CP4F   | TGACTATTATCGGTACAAGTGGTG | 4668-4691      | 1871         |
| CP4R   | TTCGTGTTTCTCTATTGCGTTTT  | 6516-6538      |              |
| CP5F   | GGACAATATAACTGTTATGCACCC | 6204-6227      | 1873         |
| CP5R   | CTACTTCCCAACCTTGTGCTTT   | 8055-8076      |              |
| CP6F   | TGAAAGTAGTGGTGGAGGTTCA   | 7859-7880      | 1798         |
| CP6R   | TTTAGGTGGCATTGTATAGCCT   | 9635-9656      |              |
| CP7F   | CGAGAATTAGGTAATGACGGTGT  | 9366-9388      | 1720         |
| CP7R   | TGCTTATTGGGTGTTTAGCTGG   | 11064-11085    |              |
| CP8F   | ACCTCCAACCTGTAGTAAAAGCA  | 10760-10781    | 1830         |
| CP8R   | TAGTAACGCCCTTCCAGTGTA    | 12568-12589    |              |
| CP9F   | TATCGGCGCAATACCAGACTAT   | 12274-12295    | 1876         |
| CP9R   | ATCAAACCTGCCTAGGTACAGCT  | 14128-14149    |              |
| CP10F  | TCAATGGTTTACTCTACTGGAAG  | 13927-13949    | 1827         |

---

|       |                            |             |      |
|-------|----------------------------|-------------|------|
| CP10R | CTGTGCATTGTCTAGCTGGTTT     | 15732-15753 |      |
| CP11F | AGTGGCTTTAGGTGTGAAATCA     | 15462-15483 |      |
| CP11R | CGAGTTGAAACGCCTGATACAT     | 17261-17282 | 1821 |
| CP12F | ATGACCCAAGTACATTTTACTG     | 16930-16953 |      |
| CP12R | TGGAAAGACTAAATGCAACAACAG   | 18553-18576 | 1647 |
| CP13F | TCAATCTTTATAAGTCCTTTTAT    | 18200-18222 |      |
| CP13R | GTCTGGACTTGACTGAGTTTATGG   | 20029-20052 | 1853 |
| CP14F | GAACCATAACCTTTGTCTTGATAG   | 19815-19838 |      |
| CP14R | TCCATAGTAGAGGCAAAGCTCC     | 21514-21535 | 1721 |
| CP15F | TGGGTCATGTAAAAGTCCTCCT     | 21254-21275 |      |
| CP15R | ACCATATAATTGACCACAAGCAGC   | 22735-22758 | 1505 |
| CP16F | TGAAGTATAAAGCAGGTTGGGAGTCA | 22013-22038 |      |
| CP16R | GAAGATACAATTGGCAGCTGGT     | 23454-23475 | 1463 |
| CP17F | TCTGAAACCCTCTTGCTAAGTTC    | 23259-23281 |      |
| CP17R | TGGCTATTATGAGCGCAGCTTT     | 25008-25029 | 1771 |
| CP18F | AGTGCCTTTTCATTTGCTGAT      | 24907-24928 |      |
| CP18R | GCCCGAACCGTACAAATATGAA     | 26761-26782 | 1876 |
| CP19F | CTGGGGTATCGTCTTAAATGCG     | 26665-26686 |      |
| CP19R | TTGCAATCACACAATCACACAA     | 28527-28548 | 1884 |
| CP20F | GCACAATACCTATCAAAACAAAG    | 28254-28276 |      |
| CP20R | TCGTTCAATTTGTTTATCACTTGCT  | 30058-30081 | 1781 |
| CP21F | TGACACGACATGAAATGACACG     | 29889-29910 | 1924 |

---

---

|       |                          |             |      |
|-------|--------------------------|-------------|------|
| CP21R | AAGCCATATATTACACCTCGCT   | 31791-31812 |      |
| CP22F | AGAAATGTAGGAGGTGCAATATGT | 31594-31617 |      |
| CP22R | TGATCGTTGGCCATTTTGTGTTGA | 33335-33356 | 1763 |
| CP23F | ATTCATGAACGAGATATAGACGGT | 33111-33134 |      |
| CP23R | GCACAGAAAACACGCTTGAAAT   | 34892-34913 | 1803 |
| CP24F | ACTTGTTTCGTCCCCTACTTCA   | 34657-34678 |      |
| CP24R | CACTTATGCGAACGTTCCGATC   | 36495-36516 | 1860 |
| CP25F | GTTGCACTTTGTCCATTTGCTT   | 36353-36374 |      |
| CP25R | GTGATTGAGGCACCTTCTGATT   | 38180-38201 | 1849 |
| CP26F | AAAGGCGTTAAGATAGTAGCTCA  | 37948-37970 |      |
| CP26R | TGTAGGCGATCTCTCAATATTGC  | 121-143     | 1700 |

---

\*The location of primer in sequence of pLRSA417

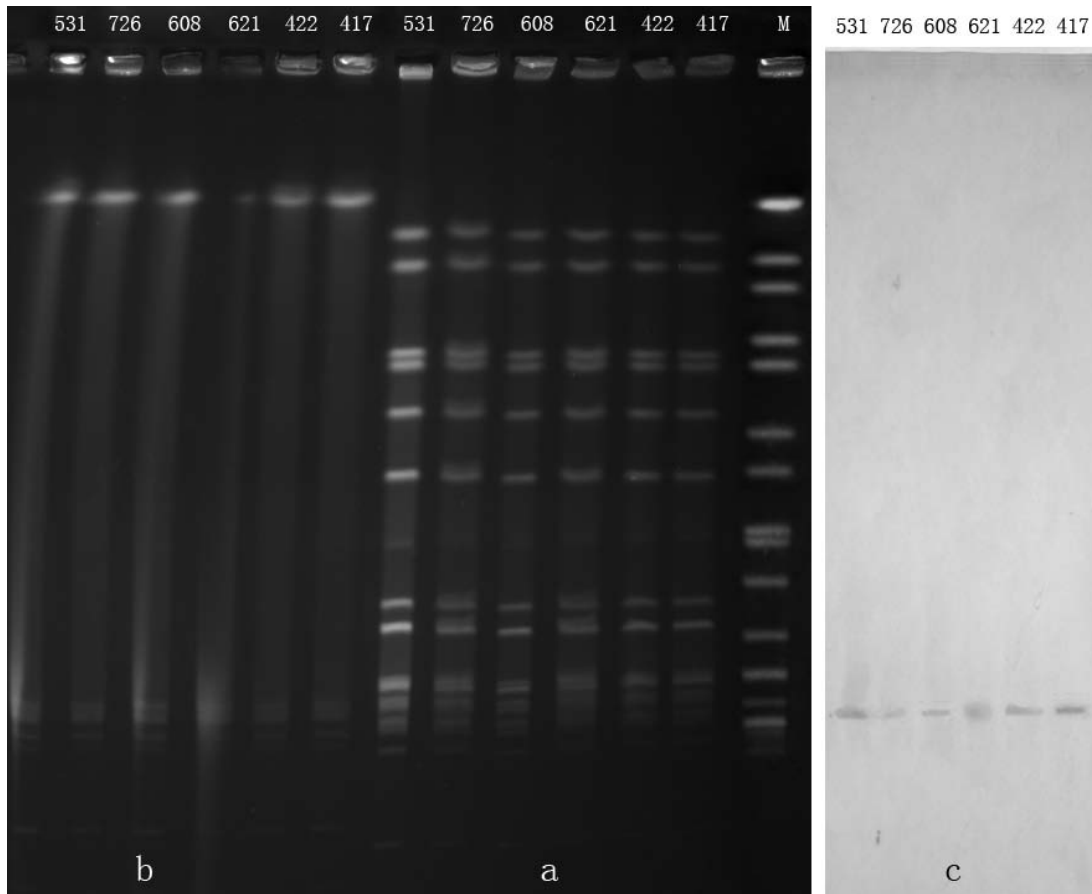

**FIG. S1.** (a) PFGE profiles of *Sma*I-digested chromosomal DNA, (b) *S*1-digested plasmid DNA, and (c) Southern blot hybridization for *cfr* gene of six LRSA. M, *Salmonella* serotype *Braenderup* H9812 digested with *Xba*I.
